# Supplementary material for: Development of a Novel Output Value for Quantitative Assessment in Methylated DNA Immunoprecipitation-CpG Island Microarray Analysis
Source: PubMed Central journal article supplement — DNA Res. 2009 Sep 18;16(5):275–86. doi: 10.1093/dnares/dsp017 (PMC2762412; doi:10.1093/dnares/dsp017), 2009-09-18
Supplement: dsp017_1.pdf [file dsp017_1.pdf]

## Supplemental Figure Legends

### *Supplemental Fig. 1*

The distribution of the average number of probes that covered (A) a single CGI or (B) a single promoter. 95% (74%) of CGIs (promoters) were covered by multiple probes.

### *Supplemental Fig. 2*

Correlation between the fraction of DNA molecules immunoprecipitated by an anti-5-methylcytosine antibody and individual output values in MeDIP-CGI microarray analysis. The fraction of DNA molecules immunoprecipitated by the anti-5-methylcytosine antibody was calculated from copy numbers obtained by real-time PCR. The signal log ratio did not show linear correlation, and normalization using the Median normalization and the Lowess normalization was not effective. The P[Xbar] value showed a relatively high correlation coefficient. The Me value showed the highest correlation coefficient.

### *Supplemental Fig. 3*

Determination of an appropriate cutoff Me value for methylated (unmethylated) CGIs. Methylation statuses of 113 CGIs were analyzed by qualitative MSP in four cell lines. Sensitivity and specificity for methylated (unmethylated) CGIs were calculated as [# of CGIs assessed as HM (UM) by MeDIP-CGI microarray among CGIs determined as methylated (unmethylated) by MSP] and [# of CGIs assessed as MM and UM (HM and MM) by MeDIP-CGI microarray among CGIs determined as partially methylated and unmethylated (partially methylated and methylated) by MSP], respectively. Arrowheads indicate selected cutoff. (A) Determination of the cutoff Me value for unmethylated CGIs. Cutoff values between 0.2 and 0.7 were tested, and a value of 0.4 was selected as a value of reasonable

sensitivity and specificity. (B) Determination of the cutoff Me value for highly methylated CGIs. Cutoff values between 0.3 and 0.8 were tested, and a value of 0.6 was selected.

#### ***Supplemental Fig. 4***

Genome-wide methylation analysis of CGIs in four gastric cancer cell lines and normal gastric tissue. (A) Fraction of methylated CGIs according to their relative positions against genes. Promoters were resistant to methylation. (B) Methylation levels in the CGIs spanning both a promoter region and gene body. The average of site Me values was plotted. Promoter was most resistant to methylation. (C, D) Methylation levels according to distances from repetitive sequences, LINE (C) and SINE (D). CGIs closer to repetitive sequences had lower Me values.

#### ***Supplemental Fig. 5***

Distribution of methylated CGIs (overall) and promoters on individual chromosomes. AGS and KATOIII had larger numbers of methylated CGIs than HSC39 and HSC57, and this relationship was consistently observed for overall CGIs on all chromosomes. However, when limited to promoters, distorted patterns were observed on some chromosomes, such as chromosome 15, 18, 21 and 22 (with an arrow).

#### ***Supplemental Fig. 6***

Relationship between expression in normal gastric tissue and methylation in cancer cells. Methylation levels (site Me values) according to gene expression in normal gastric tissues (high or low) at various positions against the TSSs. Solid lines (blue), genes with low expression in normal gastric tissue; and dotted lines (red), genes with high expression in normal gastric tissue. The genes with low expression in normal gastric tissue showed higher

methylation levels in cancer cells.

**A**

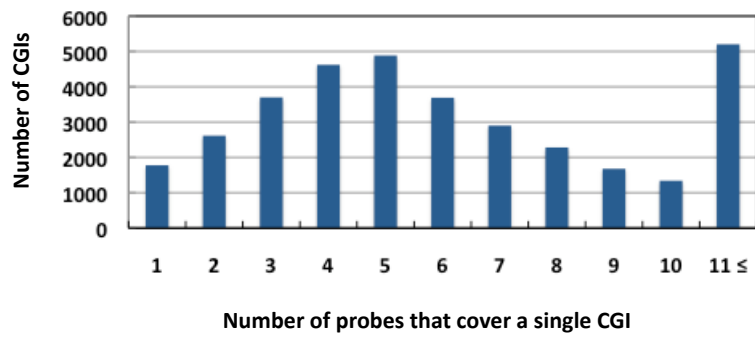

**B**

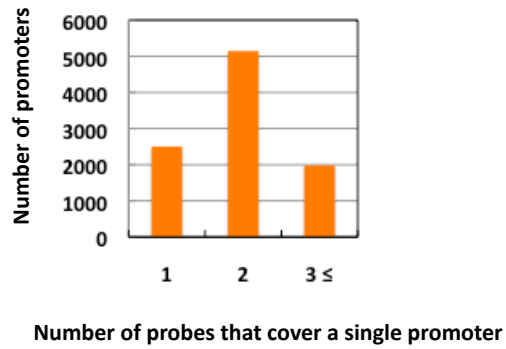

Signal log ratio – Background subtraction (r = 0.72)

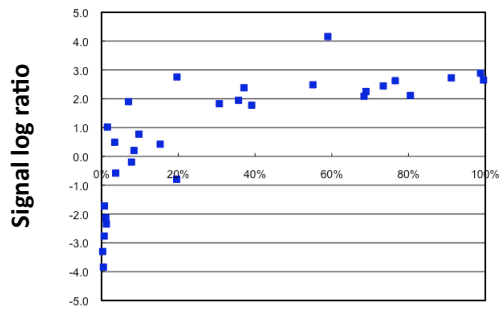

P[X] value (r = -0.79)

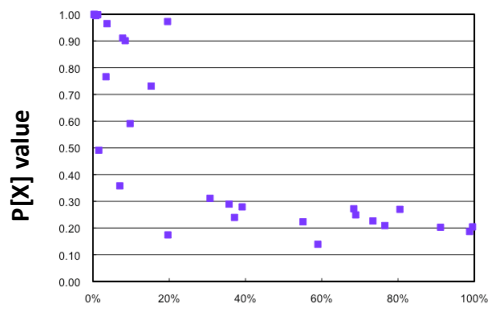

P[Xbar] value (r = -0.91)

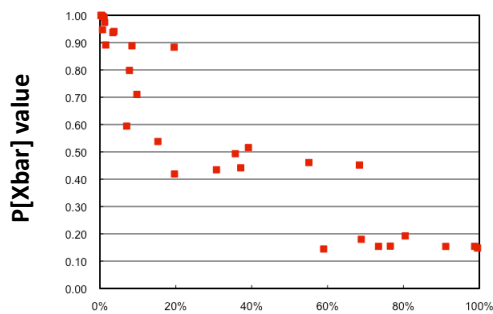

(1-P[Xbar]) x signal log ratio (r = 0.93)

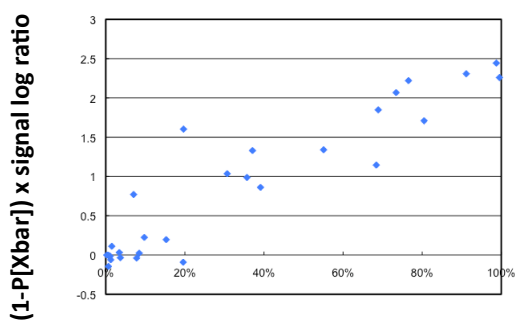

IP/WCE (real-time PCR)

Signal ratio (r = 0.63)

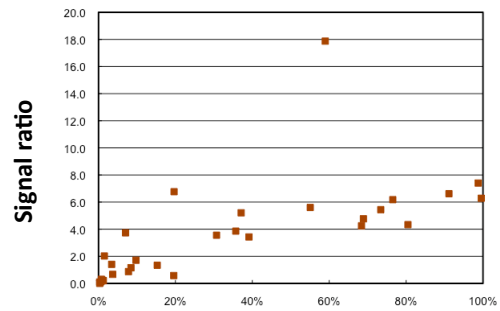

Signal log ratio – Median normalization (r = 0.71)

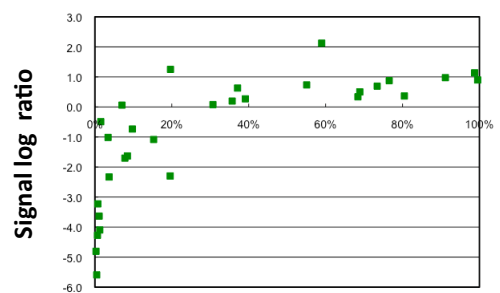

Signal log ratio – Lowess normalization (r = 0.60)

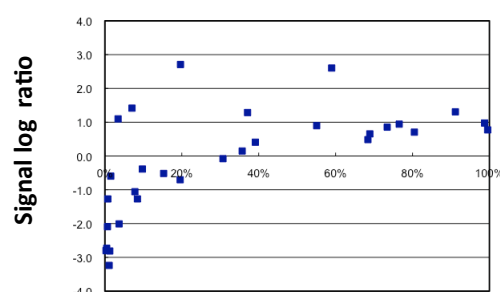

Me value (r = 0.94)

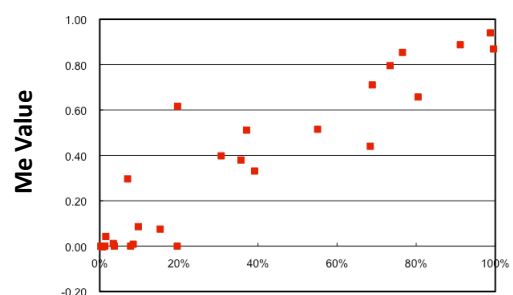

IP/WCE (real-time PCR)

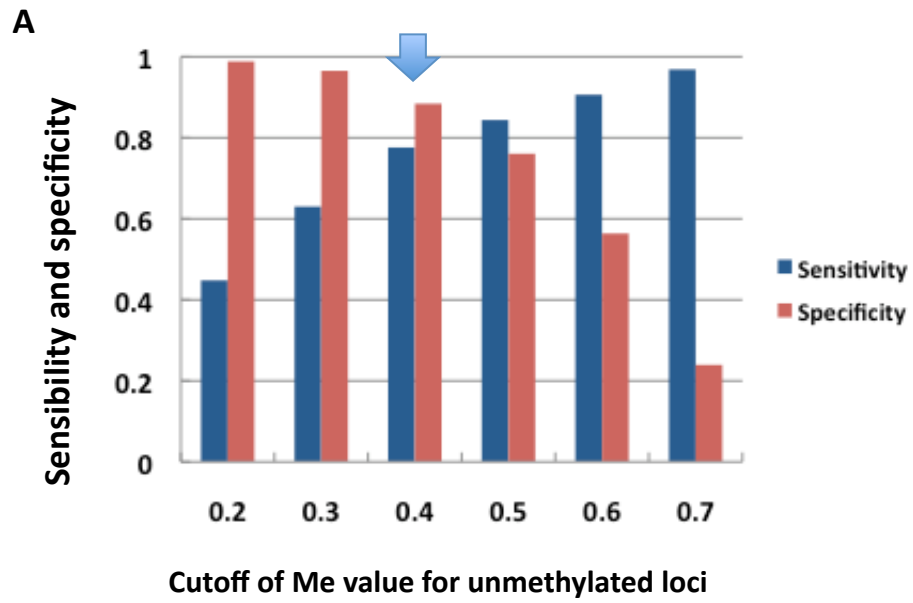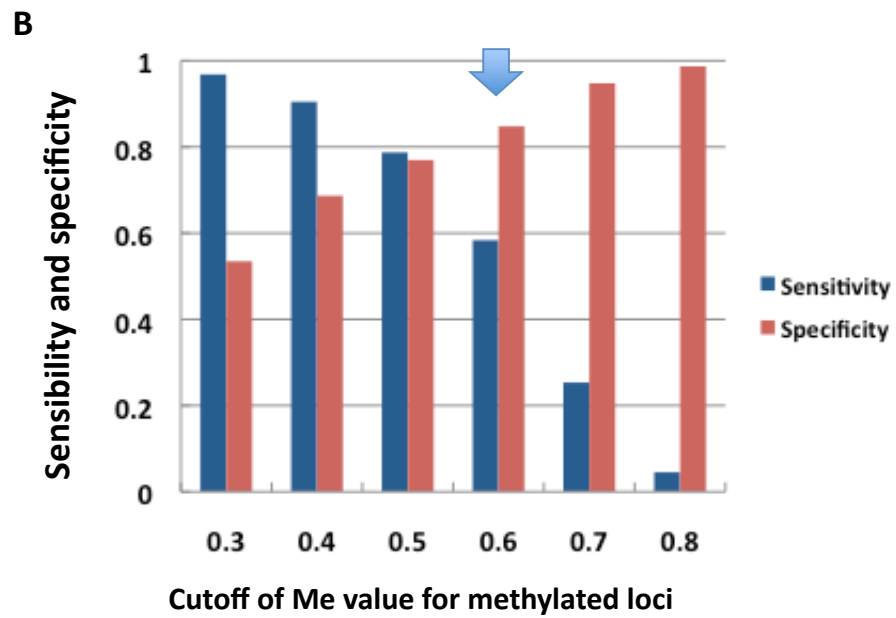

**Supplemental Fig. 3**  
**Yamashita et al.**

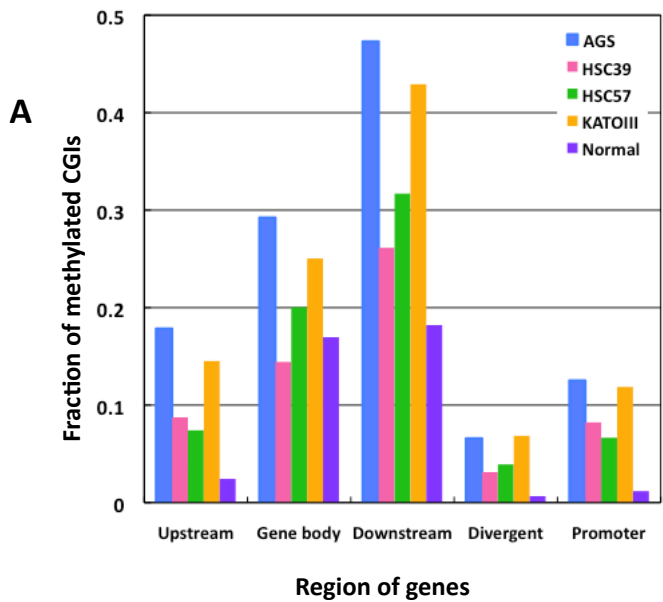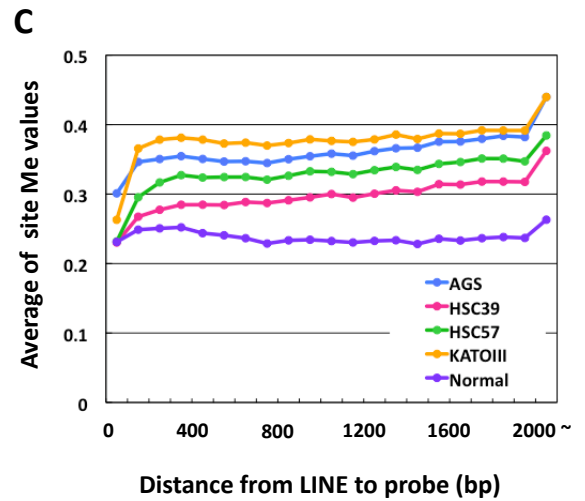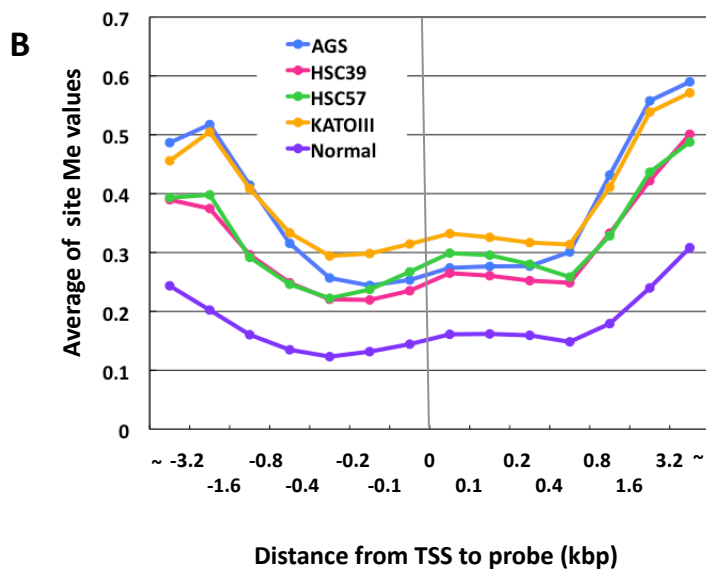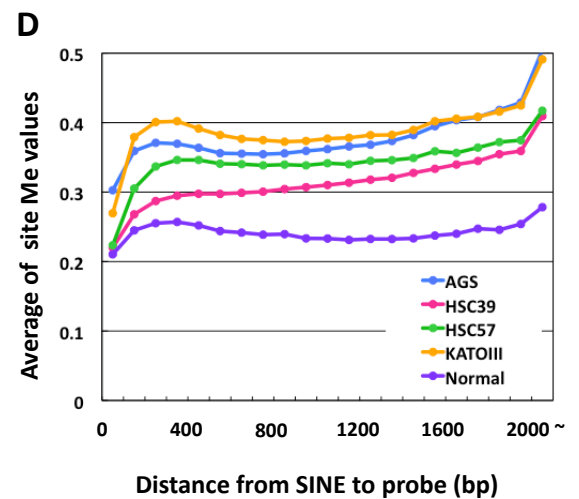

**Supplemental Fig. 4**  
Yamashita et al.

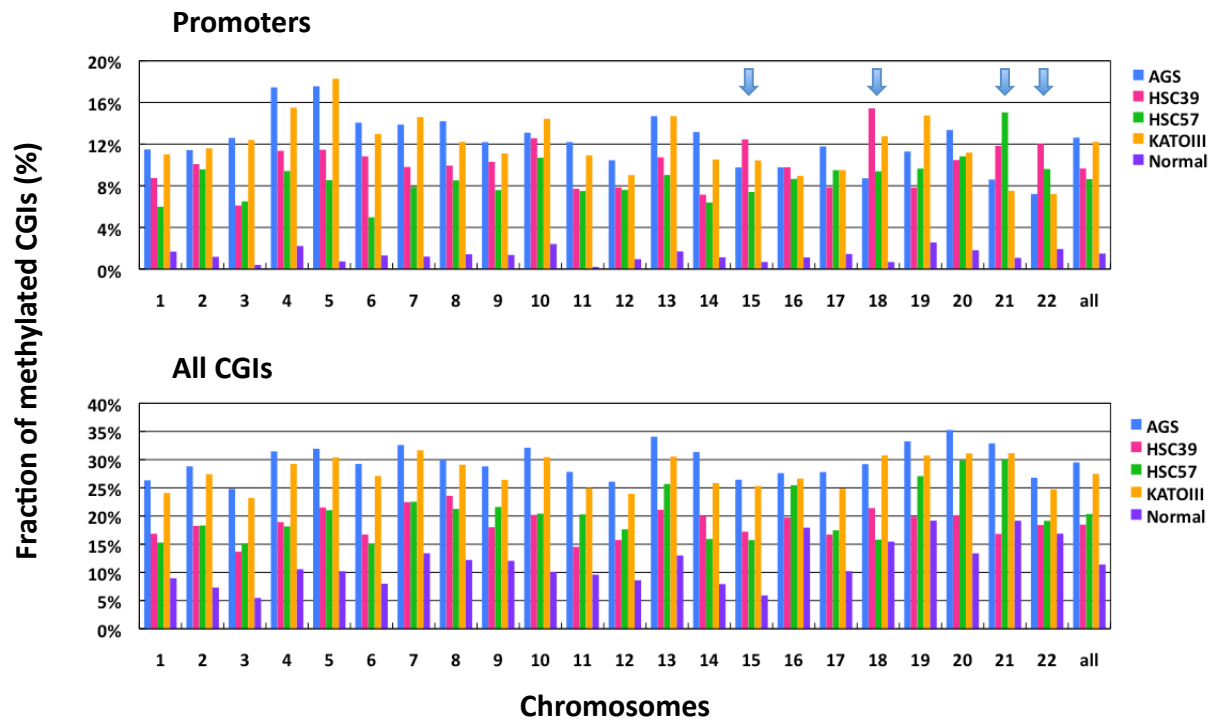

**Supplemental Fig. 5**  
**Yamashita et al.**



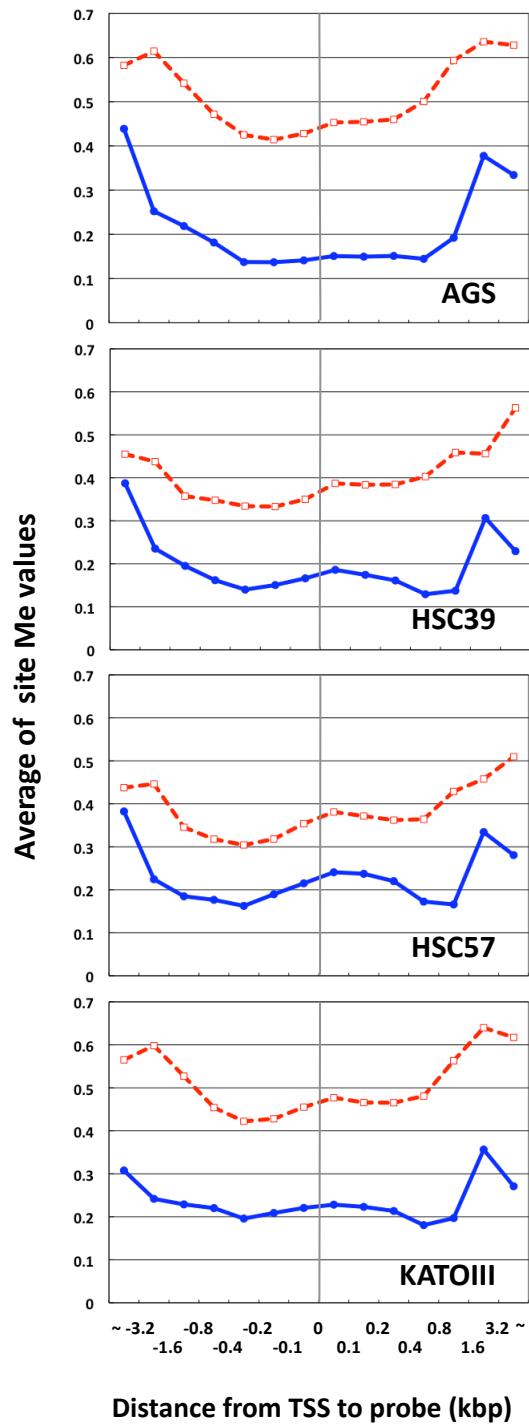

Supplemental Fig. 6  
Yamashita et al.

**Supplemental Table 1 List of primers**

| gene symbol                                         | CpG island | chromosome | TSS (NCBI) | position | forward primer sequence    | position | reverse primer sequence | reference  |
|-----------------------------------------------------|------------|------------|------------|----------|----------------------------|----------|-------------------------|------------|
| <b>Primers for MSP (primers for methylated DNA)</b> |            |            |            |          |                            |          |                         |            |
| <i>ABHD9</i>                                        | strict     | 19         | 15204231   | -195     | CGTGAGTTATCGTATTCGGTTC     | -115     | TCCTATACGAACTTAAACCGG   | (1)        |
| <i>ACAA2</i>                                        | strict     | 18         | 45593900   | -199     | GCGCGTTGTGGTTTATTC         | -14      | ACGCTAAACGACCCGCTCG     | this study |
| <i>ACSS3 (FLJ21963)</i>                             | strict     | 12         | 79995940   | -232     | CGTITTTGGAGTTTGAGCGC       | -113     | ACAAAAATATCACAACCGCG    | (2)        |
| <i>ADFP</i>                                         | strict     | 9          | 19117573   | -169     | GGTCGGGTTTCGTTCCGGTTTC     | -36      | ACCCGAATATCACCTCGAACACG | (1)        |
| <i>ADM</i>                                          | strict     | 11         | 10283218   | -163     | TTTTAAAGGAAGTAATGCGC       | -69      | AACGCACGAATAAAAAACG     | this study |
| <i>ALDH1A3</i>                                      | strict     | 15         | 99237584   | -108     | TCGGTTTCGTAGTTAATTAGGC     | -18      | GACTCGACCCGAACACTACGCA  | (1)        |
| <i>ANGPTL4 (PGAR)</i>                               | strict     | 19         | 8335011    | -499     | TTTAGGTTGGAGCGTAATGCG      | -298     | CAATAACGAAAAAACCGCACG   | (3)        |
| <i>ANXA5</i>                                        | strict     | 4          | 122837626  | -164     | TATTTAGGTTCCGAGATTAGC      | -48      | CCAAAAACCCCAACCGCAACCG  | (1)        |
| <i>AREG</i>                                         | strict     | 4          | 75529717   | -173     | TTTTAGCGAATTTTACGTAC       | -22      | ATAAAACGACGCGCACCTACCG  | (1)        |
| <i>BBS10 (FLJ23560)</i>                             | strict     | 12         | 75266338   | -276     | ATTTGGGGTAGCGGAC           | -139     | AAACTAACCCGTTATACCGC    | (2)        |
| <i>BDNF</i>                                         | strict     | 11         | 27699872   | -401     | TACGTAATAGCGAGGTTAGTC      | -214     | AACTCCGACGAACTAAATTTCG  | (1)        |
| <i>BMP7</i>                                         | strict     | 20         | 55274708   | -227     | GTTTTTTCGTTGTTTTTCGGC      | -82      | ATACTAACCCCGAACCCCTCG   | (1)        |
| <i>BNIP3</i>                                        | strict     | 10         | 133645425  | -155     | TCGTAGGATTCGTTTCGC         | -50      | AATCTACGACCCGCGC        | (2)        |
| <i>BNIP3</i>                                        | strict     | 10         | 133645425  | -688     | GTTTTTTTTTCGGGGCGGAC       | -520     | CGCTACGACTCCGAAACG      | this study |
| <i>C1orf115 (FLJ14146)</i>                          | strict     | 1          | 218930285  | -168     | TTTATTGTGTAGTGCAGTTC       | -28      | AAAAAATAAAAAACCGCAACG   | this study |
| <i>CAV1</i>                                         | relaxed    | 7          | 115952075  | -80      | TTTCGGGACGTTTTTCGGTGGT     | -6       | TAAAAACGTTTTCCCGCGCTA   | (1)        |
| <i>CDH2</i>                                         | strict     | 18         | 24011189   | -217     | TTTATCGGTAAGGTTTCGTC       | -128     | CGCTACGAATATATAAAAAAG   | (1)        |
| <i>CDKN2D</i>                                       | strict     | 19         | 10540655   | -122     | GCGGTGTCTGTATATAGTAGC      | -15      | ACTCTAAACCTACCGCCCGC    | (1)        |
| <i>CLDN3</i>                                        | strict     | 7          | 72822512   | -111     | AGGTTTTGGAGAGCGCGTTTC      | -47      | ACCTTAACTAAAACCGATACG   | (1)        |
| <i>COL4A1</i>                                       | strict     | 13         | 109757459  | -117     | GCGTCGTTCCGCTATCGTC        | 2        | TTCCAACGCTACGACCCG      | (2)        |
| <i>CTSL1</i>                                        | strict     | 9          | 89530800   | -182     | GATTTTATTTTCGTCGTTTC       | -40      | ACGTACGATTAACCTATACCG   | (1)        |
| <i>CXCR4</i>                                        | relaxed    | 2          | 136592195  | -290     | GAGAGACGCGTTTTAGTTC        | -14      | AAAATTTCTAACCGGACCG     | this study |
| <i>CYP26C1</i>                                      | relaxed    | 10         | 94811011   | -619     | TTTTTTCGTGAGCGCGTC         | -544     | CCGATTCACACAACGTAACG    | (5)        |
| <i>CYR61</i>                                        | strict     | 1          | 85819048   | -155     | GCGGTTTGGTAGTAGTTTCGC      | -10      | CTCGAAAAACGCTCTCGCTCG   | this study |
| <i>DAZL</i>                                         | relaxed    | 3          | 16622010   | -103     | GGTATCGGATTTGCGTATAC       | -29      | AAAAACTACGAAAAACGACG    | (2)        |
| <i>DDX43</i>                                        | strict     | 6          | 74161192   | -91      | TATTTTACGGTTTAGAAAATC      | -16      | CACTTCGCCTAATTTTCAGC    | this study |
| <i>DMRTB1</i>                                       | strict     | 1          | 53697660   | -89      | TCGGGATATATTCGCGATC        | -2       | AACGCTAAATAAACCAGCG     | (2)        |
| <i>DNAJC15 (DNAJD1)</i>                             | strict     | 13         | 42495362   | -231     | GTTGGTGTGATTTATCGTTTC      | -149     | CAAAAAAATATAACCGAATACC  | (2)        |
| <i>EID1 (CRI1)</i>                                  | strict     | 15         | 46957582   | -130     | GAAACCTGAGTTTAAACGCGAC     | -45      | CGCCTCTCTACTAACCGC      | (2)        |
| <i>ERBB2IP</i>                                      | strict     | 5          | 65258140   | -248     | TCGAGGTTTCGTCGAGCGTTC      | -93      | GAAAAACCAACTCCGCGCG     | (2)        |
| <i>F2R</i>                                          | strict     | 5          | 76047542   | -187     | TTAGGAGGTCGAGACGCTCGC      | -96      | TCCTTAAACACCGTTAATTCG   | (1)        |
| <i>FADS1</i>                                        | strict     | 11         | 61340886   | -234     | GTCGCTGTGATTTAGGAATC       | -34      | GCCAAAAACCAACCGCTACG    | (1)        |
| <i>FAM115A (KIAA0738)</i>                           | strict     | 7          | 143230105  | -85      | TTAAGTTTTGTAGTTTCGAGTTC    | 96       | AACCCAAACCTCGATCACCG    | this study |
| <i>FBLN2</i>                                        | strict     | 3          | 13565625   | -82      | TGGGTTTTTGTTCGCGTGC        | 164      | ACGAACACTCCACCGCCG      | (2)        |
| <i>FBN2</i>                                         | strict     | 5          | 127901634  | -412     | GGAATTCGTCGAGTTTTCGC       | -245     | AACCGACAAACCCGAAACG     | (2)        |
| <i>FERMT2 (PLEKHC1)</i>                             | strict     | 14         | 52487460   | -182     | AGGATAGTTTTCGCGGCGGC       | -29      | GTCGGATTCCTCGACTAACG    | this study |
| <i>FLNC</i>                                         | strict     | 7          | 128257719  | -10      | GAGAGAGAGTTAGAGAGCGGTCGAGC | 107      | GACCACGAACTCGCTACGCTACG | (3)        |
| <i>FOXO1A</i>                                       | strict     | 13         | 40138734   | -123     | CGTATGTTTATGGTCGCGC        | -33      | GATACGAAATCTACCGCCG     | (2)        |
| <i>FSD1</i>                                         | strict     | 19         | 4255691    | -159     | AGGTTTGGGGGAGGTTAGC        | -25      | AAACTACTTTACCGCGACCG    | (1)        |
| <i>FST</i>                                          | strict     | 5          | 52812352   | -172     | TTTAGATTAAGCGCGGTTGC       | -47      | ACGAATAACTGCAACGACG     | (1)        |
| <i>FSTL1</i>                                        | strict     | 3          | 121652515  | -226     | TCGAAGGGGCGTCGGAC          | -102     | CTACTACAACGACCCCGCG     | (2)        |
| <i>FYN</i>                                          | strict     | 6          | 112301320  | -228     | TCGTAGTATTTGGGATGTTTC      | -141     | CTACGAAACCGCAACCTAACG   | (1)        |
| <i>GREM1</i>                                        | strict     | 15         | 30797497   | -37      | GTCGCTGATTTAAACGCGGAGAC    | 63       | GAAACTCGACCGGAAATCAACG  | (1)        |
| <i>GRHL1 (TFCP2L2)</i>                              | strict     | 2          | 10009273   | -205     | CGTAATTCGCGGAACCG          | -88      | GAAACTAAAAACCGATCGCG    | (2)        |
| <i>HAND1</i>                                        | strict     | 5          | 153838017  | -259     | AATAGTTTAGGCGCTGGTTC       | -93      | AATTTTACGCTCAACCCG      | (3)        |
| <i>HAND2</i>                                        | strict     | 4          | 174687953  | -93      | GTCGAGATTCGAGGCGTC         | -21      | ACTACTCTTAAACCCGCTCG    | this study |
| <i>HDGFL1</i>                                       | strict     | 6          | 22677657   | -158     | TTATATAAGTATAATCGTTATTC    | -89      | ACCCGTTAAACCCACCTCG     | this study |
| <i>HES4</i>                                         | strict     | 1          | 925333     | -85      | TGTGGGAAAGAAATCGGAGTC      | -6       | GAATCCCGACTCCAAACCCG    | this study |
| <i>HOXB1</i>                                        | relaxed    | 17         | 43963271   | -94      | GTTATGGATTCGAGTTTATTC      | -17      | CGTCAAAACCGCAAAAAAATCG  | this study |
| <i>HRASLS</i>                                       | strict     | 3          | 194441612  | -257     | GGGTGATTTATGATGGGTGATTC    | -95      | CAACGCCTACGATCAAAACG    | (3)        |
| <i>HS3ST2</i>                                       | strict     | 16         | 22733361   | -190     | CGGTTGTTCCGAGTTTATC        | -38      | GTAACGCTACCACGACCCG     | (4)        |
| <i>HSPA1A</i>                                       | strict     | 6          | 31891316   | -153     | TGGGGGTAGGACCGGGAGGC       | -27      | ACTAACCGTTATCCGAAACCG   | this study |
| <i>IGFBP3</i>                                       | strict     | 7          | 45927396   | -40      | TTTCGGTTTTATATAGCGGTC      | 23       | AAAAAACGACTAATTCCTCAACG | (1)        |
| <i>IGFBP7</i>                                       | strict     | 4          | 57671296   | -195     | GGTCGGTTTACGTCGGGTTTC      | -18      | GACAAAAACCGGAAATAACCG   | (1)        |
| <i>IL6R</i>                                         | strict     | 1          | 152644293  | -117     | TTTTATAGCGTAATTCGTTTAC     | 78       | AACCGAAACGAATAACGCAACA  | (1)        |
| <i>INSL6</i>                                        | strict     | 9          | 5175618    | -122     | AGTTTTGGCGACGTTTTTAC       | -59      | ACTCCCTATCTACGCTACG     | this study |
| <i>IRS2</i>                                         | strict     | 13         | 109236915  | -127     | GCGCGGTTAATGCGAGGTAGC      | -29      | TAAATAACACATCGCGACCG    | (1)        |
| <i>KCNA1</i>                                        | strict     | 12         | 4889334    | -75      | TACGTTCCGGTGGGTTAATC       | -7       | GCTCGATCCATTTCTAAACG    | this study |
| <i>KCTD12</i>                                       | strict     | 13         | 76358526   | -225     | GCGGGTGGGAGTTCCGGC         | -19      | CGCTCCAACGAATACCG       | this study |
| <i>KHDC1 (C6orf148)</i>                             | relaxed    | 6          | 74029640   | -122     | GTTGGGTTTTTTCGCGCTC        | 1        | ATAACGACGACCCCGC        | (2)        |
| <i>KISS1R (GPR54)</i>                               | strict     | 19         | 868358     | -55      | TTATAAACGTTTCGTCGTAGC      | 92       | CAAAATACGCCCTAACACCG    | (1)        |
| <i>LAMA1</i>                                        | strict     | 18         | 7107813    | -333     | GGATTGTAGGGTCCGCGC         | -139     | TAAATCCCGACGACGCG       | (2)        |
| <i>LAYN (LOC143903)</i>                             | strict     | 11         | 110916443  | -315     | TTTTGGATGTTATTCGCGC        | -198     | CCAACACGAAAAACGAGC      | (2)        |
| <i>LOX</i>                                          | strict     | 5          | 121441853  | -94      | GAATAAATAGTTGAGGGCGGTC     | 11       | GCGCAATCCCGAAAAACG      | (3)        |
| <i>MGC42367 (C2orf55)</i>                           | strict     | 2          | 98919110   | -193     | ATCGTTTTTTCGTTTTTCGC       | -46      | GCCGCTCAACTCCCTCG       | this study |
| <i>MLF1</i>                                         | strict     | 3          | 159771678  | -118     | GGGTAGCGCGTATGTTTTTC       | -16      | CTCACTCGCCGACGCAACCG    | (1)        |
| <i>MLH1</i>                                         | strict     | 3          | 37009983   | -175     | TTTTAGGTAGCGGGTAGTAGTC     | -70      | GCCATCAACCCACCTTCAACG   | this study |
| <i>MSH4</i>                                         | relaxed    | 1          | 76035218   | -107     | GTTGAGTTTGTTCGTTTTGC       | -39      | CAACTACAAAAACTACGCGC    | this study |
| <i>MSX1</i>                                         | strict     | 4          | 4912300    | -171     | CGTCGTTGGGTTTTGTTTTGC      | -11      | CGACTCCGAACCTACCG       | (1)        |
| <i>MTSS1</i>                                        | strict     | 8          | 125809840  | -598     | TATTTATGTAGGATACGTTTTTC    | -484     | AAAAAACTACTACCGCTACTACG | this study |
| <i>MTSS1</i>                                        | strict     | 8          | 125809840  | -394     | AGCGCGGTTGATTTTTTC         | -248     | ACAAACGACGTAACACCG      | this study |
| <i>MTSS1</i>                                        | strict     | 8          | 125809840  | -130     | GAGAGCGGTTTTTCGTTGGC       | -32      | CGCTCCTTTTCACTCCTACG    | (1)        |
| <i>MX1</i>                                          | strict     | 21         | 41720024   | -178     | GGGTTCCGGTTCGAGAAITTCG     | -21      | TTCGCCCTTTTCAACCCG      | (1)        |
| <i>NAP1L1</i>                                       | strict     | 12         | 74764717   | -238     | AGAGGAGTTTAAAGCGCGC        | -94      | TTATAATCTCCCAACAAACCGC  | (2)        |
| <i>NEFL</i>                                         | strict     | 8          | 24870043   | -112     | GTTTGGTTGTAGTAGCGC         | -37      | ACCCTATTATACGCGC        | (5)        |
| <i>NMES1 (C15orf48)</i>                             | relaxed    | 15         | 43510055   | -191     | CGTTAGGTAAGGAAGATCGC       | -22      | CCGAATAAACCGAACCAACG    | this study |
| <i>NPY</i>                                          | strict     | 7          | 24290334   | -159     | TTTTAAGTCGATATTCGTGC       | -45      | ATAAAACTTCTCCGCG        | (5)        |
| <i>NTSE</i>                                         | strict     | 6          | 86216528   | -183     | AGTCGATAGTCGCGTTAGGGTC     | -36      | GAACAATAAACCGAAACTCG    | (1)        |
| <i>OXT</i>                                          | strict     | 20         | 3000266    | -171     | TAAACGCGGATTTGATTTTC       | -13      | TAACTATAAACGATCTTCCG    | this study |
| <i>PAX6</i>                                         | strict     | 11         | 31789455   | -74      | AGGGAGTATTAATCGGTTGGC      | 68       | CTCCTACGCCTAACCCAAACG   | (1)        |
| <i>PCDHGC4</i>                                      | relaxed    | 5          | 140844925  | -161     | TTAATAGTAAAAACCGCGC        | -12      | AAACATTACTACCGCCG       | (5)        |
| <i>PLAGL1</i>                                       | strict     | 6          | 144371246  | -195     | GTCGGGTTTATTTGCGTTAGC      | -47      | AACCCCTAACGAAAAACGTCACG | (1)        |
| <i>PLAU</i>                                         | strict     | 10         | 75340941   | -177     | TTTGTGAGCGTTGCGGAAGTAC     | -51      | ACGATCTCCGACTATACTACG   | (1)        |
| <i>PPIC</i>                                         | strict     | 5          | 122400324  | -162     | GTTTTTCGTTATCGTTAAGGC      | -33      | AAAAATAAAATCGAACCAATCCG | (1)        |
| <i>PPP1R14A</i>                                     | strict     | 19         | 43439012   | -352     | GCGGTGAGTCGAGATCGC         | -169     | CGAAAAACGCTACGCGC       | (2)        |
| <i>PRLHR</i>                                        | relaxed    | 10         | 120345150  | -121     | GTATCGAGTATGTTAGAGCGC      | 48       | CTCGATAATCCTTACCCACG    | this study |

**Supplemental Table 1 List of primers (continued)**

| gene symbol                                         | CpG island | chromosome | TSS (NCBI) | position | forward primer sequence     | position | reverse primer sequence   | reference  |
|-----------------------------------------------------|------------|------------|------------|----------|-----------------------------|----------|---------------------------|------------|
| <b>Primers for MSP (primers for methylated DNA)</b> |            |            |            |          |                             |          |                           |            |
| <i>PYCARD</i>                                       | strict     | 16         | 31121752   | -186     | CGGGGAATCGCGGAGGTTTC        | -36      | AATAAAAACCCGAAAAAAACCG    | (1)        |
| <i>RAB34</i>                                        | strict     | 17         | 24069013   | -85      | TGGCGAGGGCGGGTAGC           | 40       | AAACCTCGAATCCCACTCCG      | (2)        |
| <i>RBP4</i>                                         | strict     | 10         | 95350983   | -136     | TTCGGGTTTCGGTGAGTTAGGGC     | -36      | CCGTACTTTATAACGCCG        | (1)        |
| <i>RGC32 (C13orf15)</i>                             | strict     | 13         | 40929712   | -217     | ATCGGGGTTTCGGCGAATTTTC      | -33      | CCGCGCCCGCCCTACCACCG      | this study |
| <i>RGS2</i>                                         | strict     | 1          | 191044794  | -184     | ACGTTAGTAGCGTTTCGGTTTC      | -37      | GTCGCAACATTTATAAACCTCG    | (1)        |
| <i>RIF1</i>                                         | strict     | 2          | 151974674  | -202     | ATTCGGAAGACGTTTCGATC        | -40      | CAACTCTCAAACCTCCGCCG      | (2)        |
| <i>RORA</i>                                         | strict     | 15         | 59308794   | -213     | GGTTGGAGAAGTTTTCGTTAGC      | -111     | GACGAACGAACAAACAAAAACG    | (1)        |
| <i>SCRN1</i>                                        | strict     | 7          | 29995902   | -106     | GAGGGTGGGTTTCGGGTTAC        | -14      | CTACAATAACGAAACGACCG      | (1)        |
| <i>SLC25A4</i>                                      | strict     | 4          | 186301392  | -225     | TACGGTGTTTTTGGGTTCCGGC      | -79      | CGCCGCGCATTAATAACAAATACG  | this study |
| <i>SNAIL</i>                                        | strict     | 20         | 48032934   | -299     | AGAGGTTTCGGTTTCGTTTC        | -201     | CGTAACGATAAAAAACCCG       | this study |
| <i>SFRP2</i>                                        | strict     | 4          | 154929678  | -213     | AAATTTTAGGGCGGGCGAGC        | 4        | CCGAAAAACAAATAAACCCG      | this study |
| <i>SNAIL</i>                                        | strict     | 20         | 48032934   | -155     | ATTTGTTCCGGGAGTGGTTTTTC     | -91      | AAAAACGAAACCTTATCTACCACG  | (1)        |
| <i>SPAG6</i>                                        | strict     | 10         | 22674405   | -198     | GGTAGTGTAGGGATATTCGAC       | -62      | ACGTAACGTACACGCCG         | (5)        |
| <i>TBX3</i>                                         | strict     | 12         | 113606352  | -98      | TTGGTTCGAAAGCGTAAAGAG       | -22      | ACCGAACGTCTACTCGACGACT    | (1)        |
| <i>TFAP2C</i>                                       | strict     | 20         | 54637765   | -146     | CGGTTGCGTTAGGTTCCGGTGC      | 40       | CGCGAATATCAAAACCGCTCCG    | (1)        |
| <i>TGFBR2</i>                                       | strict     | 3          | 30622998   | -87      | GTAGTTGAAAGTCGGTTAAAGTTTTTC | -26      | CGACGTCCAACCCCTAACTCTCTCG | (6)        |
| <i>TGFBR2</i>                                       | strict     | 3          | 30622998   | 135      | GTATTCGTTCCGGATAGGAGTC      | 255      | GAACCGCAACGCAATATACG      | (6)        |
| <i>THBD</i>                                         | strict     | 20         | 22978301   | -849     | CGTTCGTTTTTATTCGGCGTC       | -750     | GCCAAACCCCACTCATCCG       | (3)        |
| <i>TNFSF9</i>                                       | strict     | 19         | 6482037    | -212     | GTCGAGTTTGGAAAGTCGGAAAC     | -65      | AAAAAACCCACGCCCTCCG       | (1)        |
| <i>TPM2</i>                                         | strict     | 9          | 35680053   | -262     | GTACGTCGGTTTTTTCGGTTC       | -97      | CGACTAAAAAACCCCGGACG      | (2)        |
| <i>TSPYL6</i>                                       | relaxed    | 2          | 54336848   | -92      | CGAGATTGAGGAGTGAGTTCGC      | -14      | CCTCGCCATTACGCCG          | (2)        |
| <i>TUBA1A (TUBA3)</i>                               | strict     | 12         | 47869128   | -234     | CGGTCGATTGTTTTGTAC          | -20      | CGACACATAAACGAATACG       | this study |
| <i>TUBB6</i>                                        | strict     | 18         | 12298257   | -14      | TAATTGCGGGTTCGGTTTC         | -142     | CTACTACAAACCGAACCCGG      | (2)        |
| <i>TUSC3</i>                                        | strict     | 8          | 15442101   | -75      | AGTTTCGGGCGGGAGCGTAC        | 85       | TACGAAAAACCCGAAACCCGG     | (2)        |
| <i>ULBP2</i>                                        | relaxed    | 6          | 150304829  | -213     | TGAGTTGTCGTGGAAGGAATC       | -89      | GTCAAACGAATATAACGTCACG    | (1)        |
| <i>UNC5C</i>                                        | strict     | 4          | 96689185   | -197     | TTAGATTTCCGGCTGCGGC         | -71      | ACTAACGTCTCCCGCAAGC       | (2)        |
| <i>WIF1</i>                                         | strict     | 12         | 63801356   | -131     | CGTTCGCTTTTTTATTTTTTTC      | -27      | AACGCGTCGCCTCCGACCTAA     | (1)        |
| <i>WNT4</i>                                         | strict     | 1          | 22342106   | -79      | GCGTTGATAGTTGGTTCGC         | -26      | CTCTACCTCCGATACCTACCG     | this study |
| <i>ZNF177</i>                                       | strict     | 19         | 9334696    | -119     | GTAGGAGTATTTCGATGTTTC       | -12      | AAAATAACGAAACGACGAACG     | (1)        |
| <i>ZNF559</i>                                       | relaxed    | 19         | 9295928    | -147     | GGTTCGGGAATTCGAGGTTTC       | -43      | TACCTCAACGCCAACGAAAAACG   | (1)        |
| <b>Primers for bisulfite sequencing</b>             |            |            |            |          |                             |          |                           |            |
| <i>C13orf21 (SERP2)</i>                             | strict     | 13         | 43845978   | -45      | GGAAGGGTTTTTGTAGATGAGA      | 146      | AAATACTCCCACACAAAAATTC    | this study |
| <i>FLNC</i>                                         | strict     | 7          | 128257719  | -1       | GTTTTGGAGGGAGAGAGGTTAGAG    | 308      | TATATTCTACTAAATCTTCTCCAC  | this study |
| <i>FSD1</i>                                         | relaxed    | 19         | 4255691    | -543     | GTTGGATTAGATAITTTTAGTTT     | -168     | CCCAAAACCCCTACATCCAA      | this study |
| <i>HAND1</i>                                        | strict     | 5          | 153838017  | -651     | TTTGTGAGGTTGGTTAGAATTG      | -442     | ATCCAAACAATTCCTCAATCCC    | this study |
| <i>IGF2</i>                                         | strict     | 11         | 2127409    | -5928    | AGATGGTAGGAAAGTGGGGAGTT     | -6318    | AAAACCTAAAACCTAAAACCCAAAC | this study |
| <i>STX5</i>                                         | strict     | 11         | 62356136   | -240     | AGAAATTTTATTTTTGGAGTTTG     | -507     | AAAATAAAAAATAACTAAAAAACCC | this study |
| <i>NKX2-8</i>                                       | strict     | 14         | 36121537   | -1547    | TGAAAGTATTTGTGTTTAAAGA      | -1771    | CAACCAAAATCTTCAATTAATC    | this study |
| <b>Primers for copy number analysis of DNA</b>      |            |            |            |          |                             |          |                           |            |
| <i>DMRTB1</i>                                       | strict     | 1          | 53697660   | 126      | AGGGACACCGGGCAAAT           | 186      | ATGATCTTCTGGCGCTCGGAG     | this study |
| <i>CYP26C1</i>                                      | relaxed    | 10         | 94811011   | -190     | CTGCAGTCTTCCACGTCCTGTC      | -96      | CGAGTGCTCACCTGTTCGGTC     | this study |
| <i>HOXB1</i>                                        | relaxed    | 17         | 43963271   | -182     | CATTGGCCTGGGAGAGATCACAT     | -56      | CCCTTTCGCTTACAACCTTT      | this study |
| <i>DNAJC15 (DNAJD1)</i>                             | strict     | 13         | 42495362   | -137     | GGGGTGGAGTAAGCAAAT          | -57      | GCCTTCTTCCCACTCTCAACT     | this study |
| <i>COL4A1</i>                                       | strict     | 13         | 109757459  | 321      | GTCCTGTAGGCTACGATCGC        | 386      | CCGGAGGAATTCCTTAACTC      | this study |
| <i>FSTL1</i>                                        | strict     | 3          | 121652515  | -58      | GGGGAAGGAGAGGTTTAAAG        | 17       | CGAGCTGTAAAGCGGAGGT       | this study |
| <i>NPY</i>                                          | strict     | 7          | 24290334   | -100     | GGGAAGTGGCGGGTGGGAGTCA      | 5        | GAGGGGTGAGAGCCAGCGGATG    | this study |
| <i>HAND1</i>                                        | strict     | 5          | 153838017  | -584     | TCCAGAAGGGCCGATGACTA        | -517     | AAGACAGGATAGCCGCTAAC      | this study |
| <i>FSD1</i>                                         | strict     | 19         | 4255691    | -448     | TTCAGTTGTGACATAGGGACA       | -341     | CAGGTTATCCGTTGCTACT       | this study |
| <i>ANXA5</i>                                        | strict     | 4          | 122837626  | -874     | GGCCACGCTTCTGCTACCCACA      | -794     | CAAACGGAAGGAGTCAAGA       | this study |
| <i>MTSS1</i>                                        | strict     | 8          | 125809840  | -614     | ACTTATCGAACTCGGCATCC        | -507     | TCTGAGAAGACGCCCAATC       | this study |
| <i>BNIP3</i>                                        | strict     | 10         | 133645425  | 805      | CCGTGCAGCACTCAGTCGT         | 869      | GATGGTCTTGCGAATCTAGC      | this study |
| <i>PAX6</i>                                         | strict     | 11         | 31789455   | 239      | CCCTACCCACACTCTTTATC        | 350      | TTTTCTCCAGGATGTTG         | this study |
| <i>TBX3</i>                                         | strict     | 12         | 113606352  | -196     | GGCGCTGCGACGTTACAGTT        | -122     | TGTTGCTGCATAGCGGTGGTT     | this study |
| <i>TFAP2C</i>                                       | strict     | 20         | 54637765   | -361     | GTCTTTTGGAGGAACGAGTGAA      | -281     | GTAACACACCTGAGATTGGC      | this study |
| <i>HRASLS</i>                                       | strict     | 3          | 194441612  | -223     | TGGGCTCAACAAAACCGAITTA      | -165     | CCGACGCCAACGTTTAGG        | this study |
| <i>TUBB6</i>                                        | strict     | 18         | 12298257   | -20      | CGCAGTTGCCGCTGTCGTC         | 98       | GCCCACCTTGGTCCGATCTG      | this study |
| <i>ZNF559</i>                                       | relaxed    | 19         | 9295928    | -452     | CAATGGGAAAATTCTAGGA         | -361     | TTTGTGAAAACGAAAGCATA      | this study |
| <i>TGFBR2</i>                                       | strict     | 3          | 30622998   | -76      | TCCGCCAAAGCTCTCGGAG         | -21      | TCGACGTCCAGCCCTAGCTC      | this study |
| <i>MLH1</i>                                         | strict     | 3          | 37009983   | -177     | CCTTCTAGGTAGCGGGCAGTA       | -88      | GCGGCAGCTATTGATGGACA      | this study |
| <i>SNAIL</i>                                        | strict     | 20         | 48032934   | 76       | GCGCTCTTCTCTCGTCAG          | 124      | AGTCTGCAGCTCGCTGTAG       | this study |

- (1) Yamashita, S. *et al.* (2006) *Cancer Sci*, 97, 64-71.  
(2) Moriguchi, K. *et al.* (2007) *Cancer Lett*, 249, 178-187.  
(3) Kaneda, A. *et al.* (2002) *Cancer Res*, 62, 6645-6650.  
(4) Abe, M. *et al.* (2008) *Oncology*, 74, 50-60.  
(5) Miyamoto, K. *et al.* (2003) *Oncogene*, 22, 274-280.  
(6) Yamashita, S. *et al.* (2008) *Cancer Res*, 68, 2112-2121.
